# Supplementary material
Source: PubMed Central journal article supplement (PMC6583261)
Supplement: jamapediatr-172-e174064-s001.pdf [file jamapediatr-172-e174064-s001.pdf]

## Supplementary Online Content

Flohr C, Henderson AJ, Kramer MS, et al. Effect of an intervention to promote breastfeeding on asthma, lung function, and atopic eczema at age 16 years: follow-up of the PROBIT randomized trial. *JAMA Pediatr*. Published online November 13, 2017. doi:10.1001/jamapediatrics.2017.4064

**eTable 1.** Characteristics of 12,183 Participants With Valid Lung Function Data

**eTable 2.** Lung Function in Those Who Reported a Diagnosis of Asthma and Wheezing

**eTable 3.** Instrumental Variable and Observational Associations of Duration and Exclusivity of Breastfeeding ( $\geq 3$  Months vs.  $< 3$  Months) With Lung Function Outcomes

**eTable 4.** Intention-to-Treat Analysis With Multiple Imputation, Comparing Intervention vs Control Groups (N = 17,046)

This supplementary material has been provided by the authors to give readers additional information about their work.

**eTable 1. Characteristics of 12,183 participants with valid lung function data**

| Characteristic                           | N (%)                |                            |                       |
|------------------------------------------|----------------------|----------------------------|-----------------------|
|                                          | Total<br>(n = 12183) | Intervention<br>(n = 6360) | Control<br>(n = 5823) |
| <b>Measured at child's birth</b>         |                      |                            |                       |
| Maternal age, y                          |                      |                            |                       |
| <20                                      | 1649 (13.5)          | 893 (14.0)                 | 756 (13.0)            |
| 20-34                                    | 10038 (82.4)         | 5209 (81.9)                | 4829 (82.9)           |
| ≥35                                      | 496 (4.1)            | 258 (4.1)                  | 238 (4.1)             |
| Maternal education                       |                      |                            |                       |
| Completed university                     | 1653 (13.6)          | 905 (14.2)                 | 748 (12.8)            |
| Advanced secondary or partial university | 6221 (51.1)          | 3009 (47.3)                | 3212 (55.2)           |
| Common secondary                         | 3881 (31.9)          | 2174 (34.2)                | 1707 (29.3)           |
| Incomplete secondary                     | 428 (3.5)            | 272 (4.3)                  | 156 (2.7)             |
| Paternal education                       |                      |                            |                       |
| Completed university                     | 1584 (13.0)          | 853 (13.4)                 | 731 (12.6)            |
| Advanced secondary or partial university | 5565 (45.7)          | 2600 (40.9)                | 2965 (50.9)           |
| Common secondary                         | 4384 (36.0)          | 2553 (40.1)                | 1831 (31.4)           |
| Incomplete secondary or unknown          | 650 (5.3)            | 354 (5.6)                  | 296 (5.1)             |
| Stratum-level variable                   |                      |                            |                       |
| East/Urban                               | 3682 (30.2)          | 1950 (30.7)                | 1732 (29.7)           |
| East/Rural                               | 1947 (16.0)          | 980 (15.4)                 | 967 (16.6)            |
| West/Urban                               | 3174 (26.1)          | 2130 (33.5)                | 1044 (17.9)           |
| West/Rural                               | 3380 (27.7)          | 1300 (20.4)                | 2080 (35.7)           |
| Number children in household             |                      |                            |                       |
| 0                                        | 6923 (56.8)          | 3750 (59.0)                | 3173 (54.5)           |
| 1                                        | 4252 (34.9)          | 2123 (33.4)                | 2129 (36.6)           |
| 2+                                       | 1008 (8.3)           | 487 (7.7)                  | 521 (8.9)             |
| Maternal smoking during pregnancy        |                      |                            |                       |
| No                                       | 11940 (98.0)         | 6207 (97.6)                | 5733 (98.5)           |
| Yes                                      | 243 (2.0)            | 153 (2.4)                  | 90 (1.5)              |

| Characteristic                          | N (%)                |                            |                       |
|-----------------------------------------|----------------------|----------------------------|-----------------------|
|                                         | Total<br>(n = 12183) | Intervention<br>(n = 6360) | Control<br>(n = 5823) |
| <b>Child at birth</b>                   |                      |                            |                       |
| Child sex                               |                      |                            |                       |
| Female                                  | 6288 (51.6)          | 3252 (51.1)                | 3036 (52.1)           |
| Male                                    | 5895 (48.4)          | 3108 (48.9)                | 2787 (47.9)           |
| Birthweight, mean (SD), kg              | 3.44 (0.42)          | 3.44 (0.42)                | 3.44 (0.42)           |
| Gestation length, mean (SD), weeks      | 39.4 (1.0)           | 39.4 (1.0)                 | 39.3 (1.0)            |
| <b>Measured in child's first year</b>   |                      |                            |                       |
| Duration of exclusive breastfeeding, mo |                      |                            |                       |
| <3                                      | 8870 (73.3)          | 3465 (55.1)                | 5405 (92.9)           |
| 3-<6                                    | 2794 (23.1)          | 2429 (38.6)                | 365 (6.3)             |
| ≥6                                      | 437 (3.6)            | 391 (6.2)                  | 46 (0.8)              |
| Duration of breastfeeding, mo           |                      |                            |                       |
| <3                                      | 4207 (34.8)          | 1872 (29.8)                | 2335 (40.2)           |
| 3-<6                                    | 2785 (23.0)          | 1417 (22.5)                | 1368 (23.5)           |
| ≥6                                      | 5111 (42.2)          | 3000 (47.7)                | 2111 (36.3)           |

SD = standard deviation

**eTable 2. Lung function in those who reported a diagnosis of asthma and wheezing**

|                        | <b>Wheezing in past 12 months</b>   |              |                     |         |                     |         |
|------------------------|-------------------------------------|--------------|---------------------|---------|---------------------|---------|
|                        | Yes                                 | No           | Cluster adjusted    |         | Further adjusted*   |         |
|                        | n=767                               | n=11382      |                     |         |                     |         |
| <b>Outcome</b>         | Mean (SD)                           |              | $\beta$ (95% CI)    | p-value | $\beta$ (95% CI)    | p-value |
| FEV1 z-score           | -0.59 (1.44)                        | -0.41 (1.40) | -0.13 (-0.23,-0.04) | 0.01    | -0.14 (-0.23,-0.04) | 0.004   |
| FVC z-score            | -0.49 (1.26)                        | -0.35 (1.19) | -0.05 (-0.13, 0.04) | 0.27    | -0.05 (-0.13, 0.03) | 0.26    |
| FEV1/FVC ratio z-score | 0.02 (1.61)                         | 0.12 (1.62)  | -0.19 (-0.29,-0.09) | 0.01    | -0.19 (-0.29,-0.09) | 0.0003  |
|                        | <b>Ever asthma</b>                  |              |                     |         |                     |         |
|                        | Yes                                 | No           | Cluster adjusted    |         | Further adjusted*   |         |
|                        | n=204                               | n=11941      |                     |         |                     |         |
| <b>Outcome</b>         | Mean (SD)                           |              | $\beta$ (95% CI)    | p-value | $\beta$ (95% CI)    | p-value |
| FEV1 z-score           | -0.77 (1.34)                        | -0.42 (1.40) | -0.24 (-0.41,-0.06) | 0.01    | -0.26 (-0.44,-0.08) | 0.004   |
| FVC z-score            | -0.44 (1.14)                        | -0.36 (1.20) | -0.08 (-0.24, 0.07) | 0.29    | -0.08 (-0.24, 0.07) | 0.29    |
| FEV1/FVC ratio z-score | -0.35 (1.65)                        | 0.12 (1.62)  | -0.31 (-0.50,-0.11) | 0.01    | -0.34 (-0.53,-0.14) | 0.001   |
|                        | <b>Asthma attack past 12 months</b> |              |                     |         |                     |         |
|                        | Yes                                 | No           | Cluster adjusted    |         | Further adjusted*   |         |
|                        | n=49                                | n=12092      |                     |         |                     |         |
| <b>Outcome</b>         | Mean (SD)                           |              | $\beta$ (95% CI)    | p-value | $\beta$ (95% CI)    | p-value |
| FEV1 z-score           | -0.85 (1.60)                        | -0.42 (1.40) | -0.21 (-0.57, 0.15) | 0.26    | -0.26 (-0.61, 0.10) | 0.16    |
| FVC z-score            | -0.39 (1.22)                        | -0.36 (1.20) | 0.00 (-0.31, 0.31)  | >0.99   | -0.01 (-0.32, 0.30) | 0.94    |
| FEV1/FVC ratio z-score | -0.43 (1.91)                        | 0.12 (1.62)  | -0.30 (-0.69, 0.09) | 0.13    | -0.34 (-0.73, 0.05) | 0.08    |

\*Adjusted for stratum-level variables (urban vs rural and East vs West Belarus residence), maternal and paternal education, and child sex, birth weight, gestation length, and age at follow-up

**eTable 3. Instrumental Variable and Observational Associations of Duration and Exclusivity of Breastfeeding (≥3 Months vs. <3 Months) With Lung Function Outcomes**

|                        | Instrumental variable analysis                     |                      | Observational analysis                             |                    |
|------------------------|----------------------------------------------------|----------------------|----------------------------------------------------|--------------------|
|                        | Exclusive breastfeeding ≥3 vs. <3 months (control) |                      | Exclusive breastfeeding ≥3 vs. <3 months (control) |                    |
|                        | Cluster-adjusted                                   | Further adjusted *   | Cluster-adjusted                                   | Further adjusted * |
| <b>Lung Function</b>   | <b>β (95% CI)</b>                                  |                      | <b>β (95% CI)</b>                                  |                    |
| FEV1 z-score           | -1.14 (-2.31, 0.02)                                | -1.00 (-2.17, 0.18)  | 0.03 (-0.03, 0.09)                                 | 0.03 (-0.03, 0.10) |
| FVC z-score            | -0.62 (-1.56, 0.32)                                | -0.49 (-1.61, 0.63)  | 0.03 (-0.03, 0.08)                                 | 0.03 (-0.02, 0.08) |
| FEV1:FVC ratio z-score | -0.41 (-2.06, 1.25)                                | -0.41 (-2.30, 1.47)  | 0.01 (-0.06, 0.08)                                 | 0.01 (-0.06, 0.08) |
| FEV1:FVC ratio x 100   | -5.34 (-17.76, 7.08)                               | -5.23 (-19.31, 8.85) | 0.09 (-0.44, 0.62)                                 | 0.10 (-0.43, 0.62) |

\*Adjusted for stratum-level variables (urban vs. rural and East vs. West Belarus), and for child age at follow-up, sex, birthweight, and both maternal and paternal education. Asthma and lung function models were also adjusted for gestational age at birth.

**eTable 4. Intention-to-treat analysis with multiple imputation, comparing intervention vs control groups (N = 17,046)**

|                                           | Group, No. (%)        |                  | OR (95% CI)         |                     |
|-------------------------------------------|-----------------------|------------------|---------------------|---------------------|
|                                           | Intervention (n=8865) | Control (n=8181) | Cluster-adjusted    | Further adjusted*   |
| Flexural eczema on skin examination       | 29 (0.3)              | 49 (0.6)         | 0.57 (0.32, 1.00)   | 0.55 (0.32, 0.95)   |
| Flexural eczema past year                 | 41 (0.5)              | 52 (0.6)         | 0.66 (0.34, 1.27)   | 0.66 (0.34, 1.27)   |
| Sleep-disturbed flexural eczema past year | 18 (0.2)              | 28 (0.3)         | 0.63 (0.28, 1.39)   | 0.65 (0.28, 1.52)   |
|                                           | Group, No. (%)        |                  | OR (95% CI)         |                     |
|                                           | Intervention (n=8865) | Control (n=8181) | Cluster-adjusted    | Further adjusted*   |
| Ever asthma                               | 140 (1.6)             | 136 (1.7)        | 0.86 (0.56, 1.32)   | 0.85 (0.56, 1.29)   |
| Wheezing past 12 months                   | 542 (6.1)             | 524 (6.4)        | 0.77 (0.48, 1.22)   | 0.71 (0.45, 1.10)   |
| Asthma attack in the past 12 months       | 37 (0.4)              | 29 (0.4)         | 1.09 (0.57, 2.06)   | 1.09 (0.57, 2.06)   |
|                                           | Group, mean (SD)      |                  | $\beta$ (95% CI)    |                     |
|                                           | Intervention (n=8865) | Control (n=8181) | Cluster-adjusted    | Further adjusted*   |
| FEV1 z-score                              | -0.68 (1.53)          | -0.23 (1.22)     | -0.34 (-0.66,-0.01) | -0.29 (-0.60, 0.02) |
| FVC z-score                               | -0.46 (1.25)          | -0.31 (1.14)     | -0.19 (-0.51, 0.13) | -0.14 (-0.46, 0.17) |
| FEV1:FVC ratio z-score                    | -0.02 (2.75)          | 0.32 (2.09)      | -0.09 (-0.66, 0.49) | -0.09 (-0.65, 0.47) |
| FEV1:FVC ratio x 100*                     | 85.15 (15.2)          | 88.38 (10.6)     | -1.51 (-5.36, 2.34) | -1.49 (-5.26, 2.29) |

\*Adjusted for stratum-level variables (urban vs. rural and East vs. West Belarus), and for child age at follow-up, sex, birthweight, and maternal and paternal education. Asthma and lung function models were also adjusted for gestational age at birth.
